# Supplementary material
Source: MDPI journal article supplement (https://www.mdpi.com/2073-4352/11/9/1042)
Supplement: s1 [file s1]

Supplementary Information

**Charge Compensation in Europium-Doped Hafnia Nanoparticles: Solvothermal Synthesis  
and Colloidal Dispersion**

**Xavier H. Guichard <sup>1</sup>, Francesco Bernasconi <sup>1</sup> and Alessandro Lauria <sup>1,\*</sup>**

<sup>1</sup> Laboratory for Multifunctional Materials, Department of Materials, ETH Zürich, Vladimir-Prelog-Weg 5, 8093 Zürich, Switzerland;

\* Correspondence: [alessandro.lauria@mat.ethz.ch](mailto:alessandro.lauria@mat.ethz.ch)

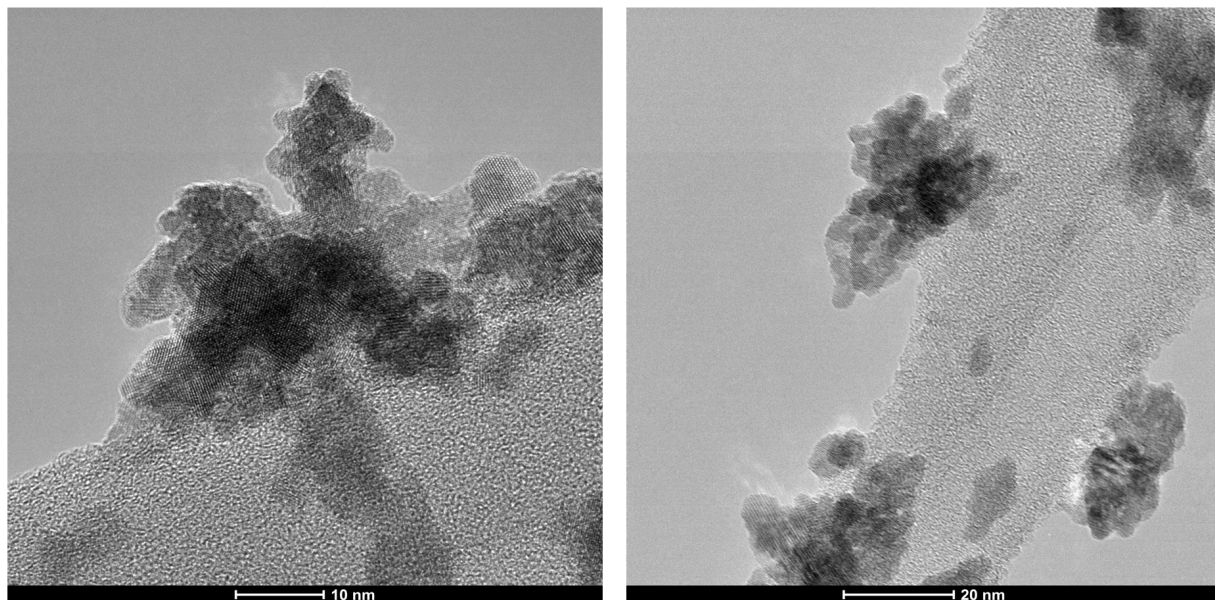

**Figure S1.** TEM micrographs of  $\text{HfO}_2$ : 6 Eu, 6 Nb on lacey carbon showing highly crystalline particles with average crystal size between 5 and 10 nm as well as the occurrence of agglomerates sizing up to few tens of nanometres.

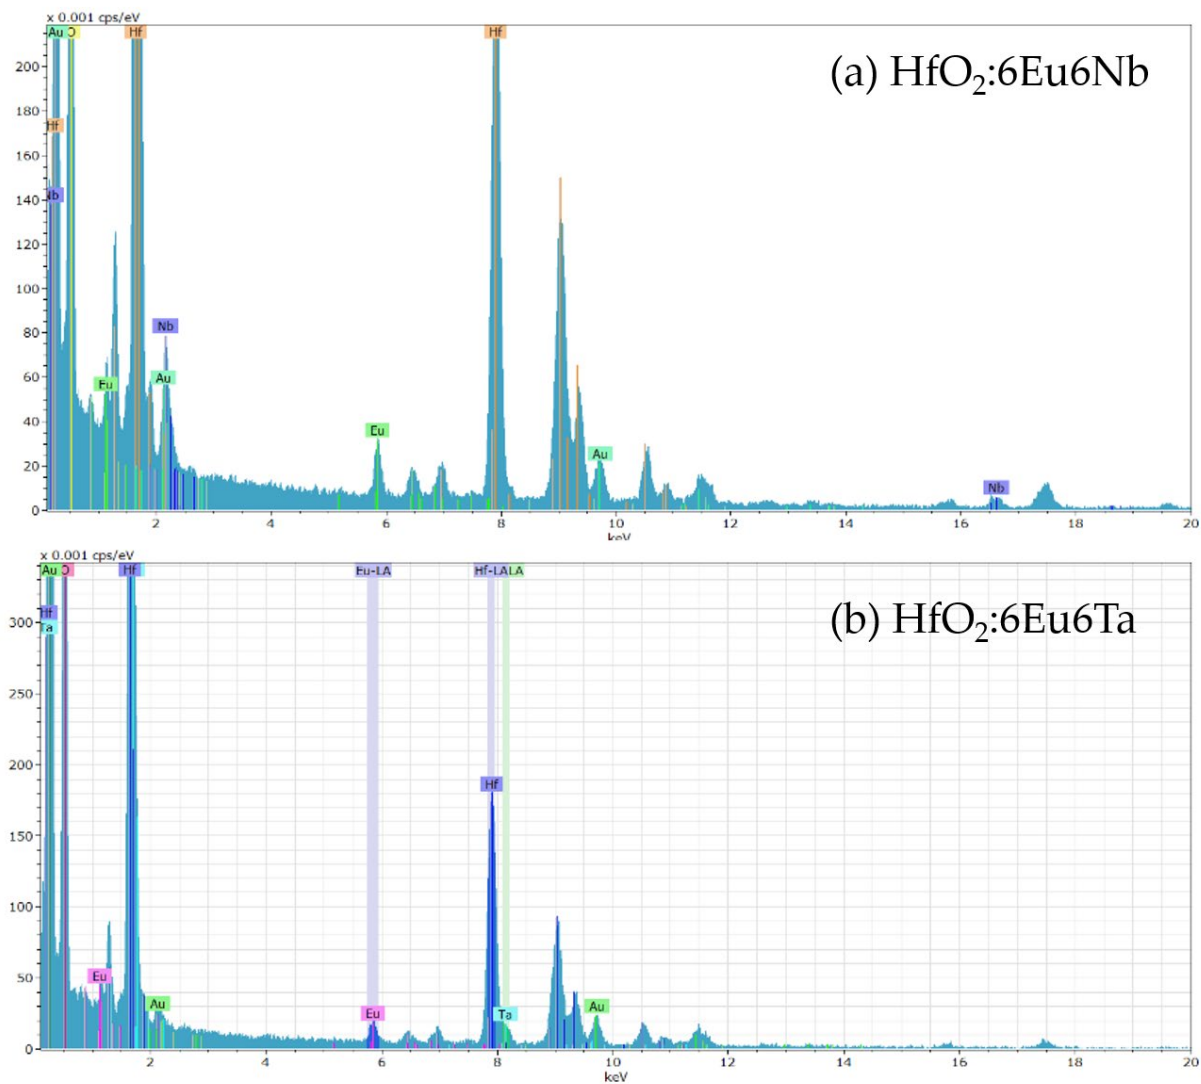

**Figure S2.** EDS analysis on co-doped nanoparticles. (a) and (b): Energy-dispersive X-ray (EDX) spectra of the sample  $\text{HfO}_2:6\text{Eu}, 6\text{Nb}$  and  $\text{HfO}_2:6\text{Eu}, 6\text{Ta}$ , respectively.

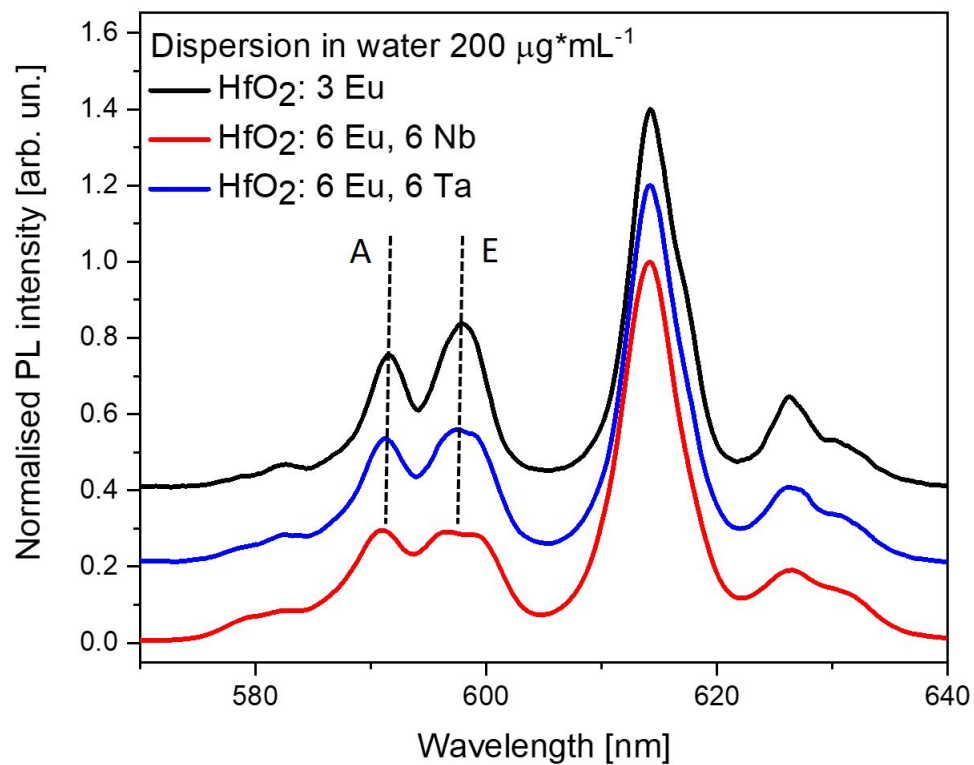

**Figure S3.** PL spectra of HfO<sub>2</sub>: 3 Eu, HfO<sub>2</sub>: 6 Eu, 6 Ta, and HfO<sub>2</sub>: 6 Eu, 6 Nb excited at 205, 225 and 255 nm, respectively. The dotted lines mark the  $^5\text{D}_0 \rightarrow ^7\text{F}_1$  transition showing the splitting of the  $^7\text{F}_1$  level attributed to the A and E levels and visible stronger sub-splitting of the E level for Ta and Nd charge compensated HfO<sub>2</sub>.

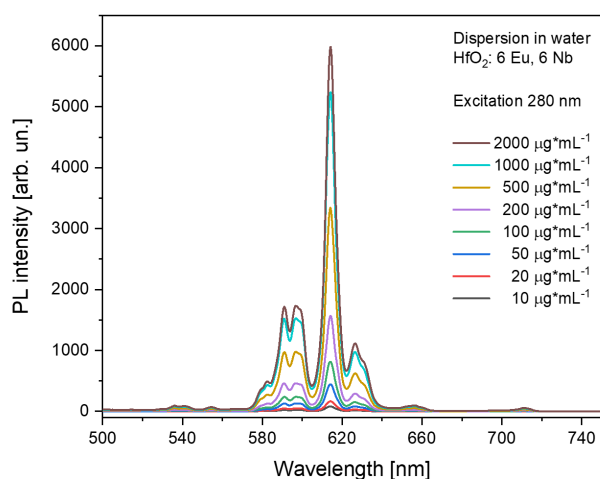

(a)

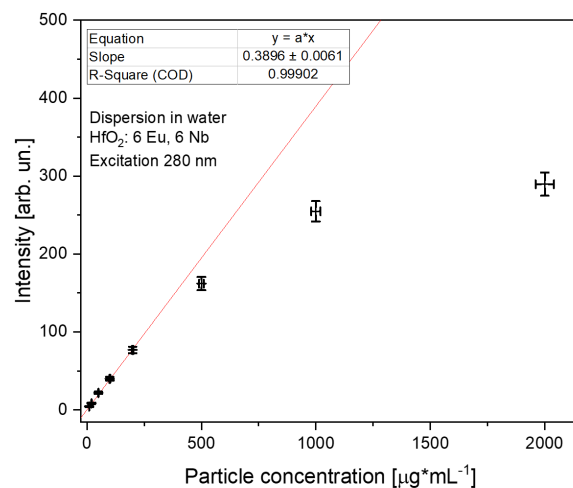

(b)

**Figure S4.** Optical characterization of the HfO<sub>2</sub>: 6 Eu, 6 Nb water dispersion at different particle loadings. (a) PL excited at 280 nm depending on the particle concentration (b) Integrated intensities (integration range: 515 - 745 nm) and linear fit at different concentrations spanning from 10 to 200 µg\*mL<sup>-1</sup>.
